# Supplementary material for: Suburothelial Bladder Contraction Detection with Implanted Pressure Sensor
Source: PubMed Central journal article supplement (PMC5218553; doi:10.1371/journal.pone.0168375), 2017-01-06
Supplement: pone.0168375.s001.pdf [file pone.0168375.s001.pdf]

**Supplementary Information for: Suburothelial Bladder  
Contraction Detection with Implanted Pressure Sensor**

Correlation coefficients extracted from 10-s windows of raw data

These data are plotted as boxplots in Fig. 4

| <b>Feline</b> | <b>Canine -<br/>Submucosal</b> | <b>Canine -<br/>Intraluminal</b> | <b>Ambulatory -<br/>Terminal</b> |
|---------------|--------------------------------|----------------------------------|----------------------------------|
| 0.897         | 0.911                          | 0.990                            | 0.708                            |
| 0.892         | 0.891                          | 0.929                            | 0.774                            |
| 0.981         | 0.815                          | 0.995                            | 0.937                            |
| 0.904         | 0.920                          | 0.980                            | 0.983                            |
| 0.928         | 0.900                          | 0.977                            | 0.881                            |
| 0.974         | 0.907                          | 0.974                            | 0.907                            |
| 0.906         | 0.915                          | 0.997                            | 0.777                            |
| 0.952         | 0.832                          | 0.978                            | 0.962                            |
| 0.994         | 0.889                          | 0.981                            | 0.593                            |
| 0.881         | 0.891                          |                                  | 0.984                            |
| 0.899         | 0.882                          |                                  |                                  |
| 0.897         | 0.908                          |                                  |                                  |
| 0.890         |                                |                                  |                                  |
| 0.904         |                                |                                  |                                  |
| 0.976         |                                |                                  |                                  |
| 0.963         |                                |                                  |                                  |
